# Supplementary material for: Biobased chitosan hybrid aerogels with superior adsorption: Role of graphene oxide in CO2 capture
Source: Royal Society of Chemistry journal article supplement (doi:10.1039/c3ra42022a), 2013-01-01
Supplement: c3ra42022a.pdf [file c3ra42022a.pdf]

Supplementary Information:

**Biobased chitosan hybrid aerogels with superior adsorption: Role of graphene  
oxide in CO<sub>2</sub> capture**

**Almahdi A. Alhwaige<sup>1,2,†</sup>, Tarek Agag<sup>3</sup>, Hatsuo Ishida<sup>2</sup>, Syed Qutubuddin<sup>1,2,\*</sup>**

<sup>1</sup>*Department of Chemical Engineering, Case Western Reserve University, Cleveland, Ohio  
44106-7217, USA*

<sup>2</sup>*Department of Macromolecular Science and Engineering, Case Western Reserve University,  
Cleveland, OH 44106-7202, USA*

<sup>3</sup>*Lord Corporation, Erie, PA 16509, USA*

---

\* Corresponding author: Syed Qutubuddin (sxq@)cwru.edu)

† On leave from El-Mergib University-Libya (aaa148@case.edu)

## 1. Experimental

### 1.1. Materials

Graphite powder (micro 850) was kindly provided by Asbury Graphite Mills, Inc. Concentrated sulfuric acid ( $\text{H}_2\text{SO}_4$ , 98%), potassium permanganate ( $\text{KMnO}_4$  crystal), hydrogen peroxide ( $\text{H}_2\text{O}_2$ , 30% aqueous solution), concentrated hydrochloric acid ( $\text{HCl}$ ), and glacial acetic acid ( $\text{CH}_3\text{COOH}$ ) were purchased from Fisher Scientific company.

### 1.2. Preparation of Graphene Oxide (GO)

Graphene oxide was synthesized from natural graphite powder by the modified Hummer's method, as described in the literature [1]. In brief, 3g natural graphite powder was added to 120 ml concentrated  $\text{H}_2\text{SO}_4$  (98%) under stirring in an ice-bath ( $0^\circ\text{C}$ ). Next, 15 g of  $\text{KMnO}_4$  was added slowly under stirring. To control the temperature below  $20^\circ\text{C}$ ,  $\text{KMnO}_4$  was added gradually. The ice-bath was then taken-off and the system was heated at  $35^\circ\text{C}$  for 2 h. Then, 250 ml deionized water was gradually added into the system and left under stirring for another 2 h. Then a solution of 700 mL deionized water with 120 mL 30 %  $\text{H}_2\text{O}_2$  aqueous solution was added gradually to reduce the residual  $\text{KMnO}_4$  till no bubble appeared. The color of mixture changed into brilliant yellow along with bubbling. The mixture was filtered and washed twice with 1:10  $\text{HCl}$  aqueous solution (1L) to remove metal ions followed by 1 L of deionized water to remove acid. Finally, the solution was filtered resulting in a yellow-brown filter cake, which was washed by deionized water until the pH value of the suspension reached near 7, and then graphene oxide was dried under vacuum for 48 h at  $60^\circ\text{C}$ .

### 1.3. Characterizations

Micro Raman scattering studies were carried out at room temperature using a Horiba Jobin-Yvon LabRam HR800 spectrometer which is equipped with a charge coupled detector and two

grating systems (600 and 1800 lines/mm). A HeNe laser ( $\lambda = 632.8$  nm), with an optical power of 17 mW and a spot size of  $1 \mu\text{m}^2$ , was focused on the sample with an Olympus microscope. Raman shifts were calibrated with a Si (100) wafer using the  $520 \text{ cm}^{-1}$  peak.

Fourier transform infrared (FT-IR) spectra were obtained on a Bomem Michelson MB-100 FT-IR spectrometer, which was equipped with a deuterated triglycine sulfate (DTGS) detector. Thirty two scans were recorded at a resolution of  $4 \text{ cm}^{-1}$  after purging with dry air.

## 2. RESULTS AND DISCUSSION

### 2.1. Preparation of Graphene Oxide

In a typical preparation, graphene oxide is produced by oxidizing graphite (C:O ratios of approximately 2:1) [2] which ultimately disrupts the delocalized electronic structure of graphite and imparts a variety of oxygen-based chemical functionalities to the surface. The oxidation of graphite has been confirmed by Raman spectroscopy and FT-IR.

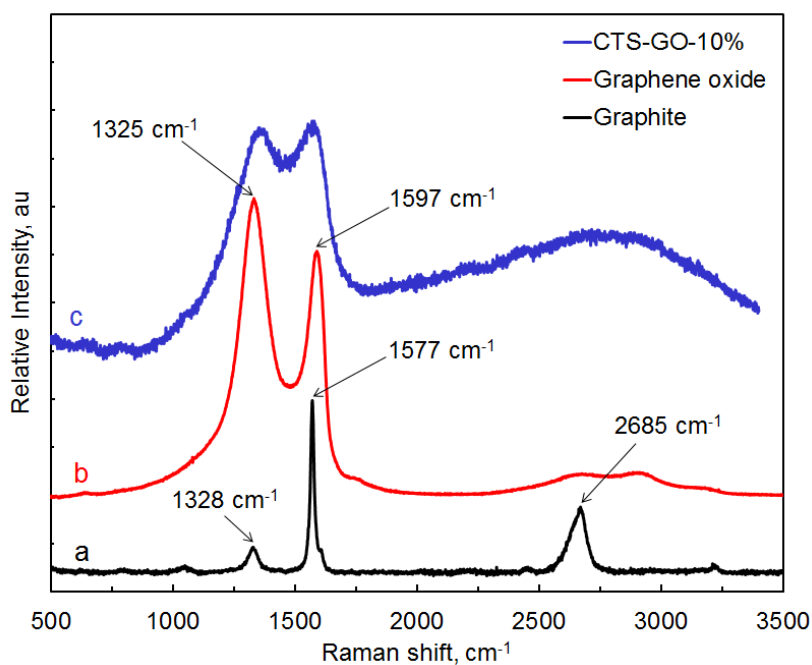

**Figure S1.** Raman spectra of: (a) graphite, (b) GO at  $60^\circ\text{C}$ , and (c) CTS-GO-10% at  $400^\circ\text{C}$ .

Figure S1 shows the Raman spectra of neat graphite, GO at 60 °C and CTS-GO-10% at 400 °C. As shown in Figure S1, the Raman spectrum of natural graphite exhibits strong lines at 1577  $\text{cm}^{-1}$  and 2685  $\text{cm}^{-1}$ , which are assigned to the G band and 2D band, respectively, while the D band is shown a weak band at 1328  $\text{cm}^{-1}$ . The G band is attributed to the first-order scattering of the  $E_{2g}$  vibrational mode in graphite sheets and the 2D band is the overtone of the D band [3,4]. The two most intense lines appearing at 1597 and 1330  $\text{cm}^{-1}$  for graphene oxide correspond to the G and D bands, respectively [5]. As shown in the graphene oxide spectra, The D band shifts to higher frequency and becomes prominent. The ratio of D to G band intensity ( $I_D/I_G$ ) equals to 1.27, indicating the reduction in the average size of  $sp^2$  domains due to the extensive oxidation. The 2D band of graphene oxide is seen to be broadening and decrease in relative intensity, indicating presence of defects in graphitic materials [5,6].

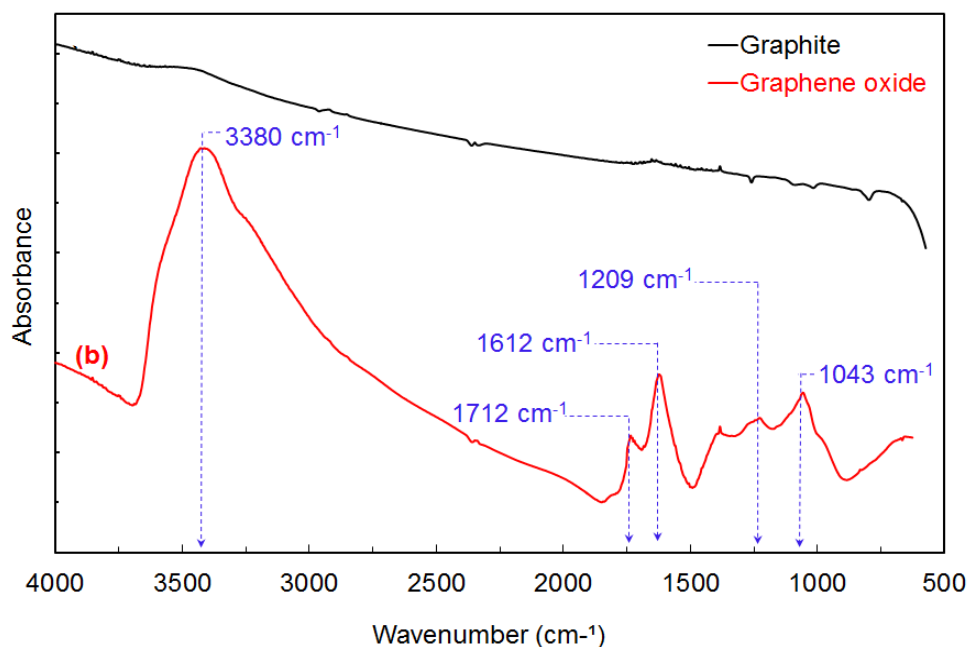

**Figure S2.** FT-IR spectra of: (a) graphite and (b) graphene oxide.

FT-IR results confirm the introduction of oxygen-based functional groups on the basal plane and edge of graphene. Figure S2 shows FT-IR spectra of natural graphite and neat graphene oxide. Expectedly, there is no significant peak found in the natural graphite spectrum. Otherwise, the spectrum of graphene oxide shows characteristic band at  $3380\text{ cm}^{-1}$  (the OH stretching mode),  $1720\text{ cm}^{-1}$  (the C=O stretching mode of carboxylic acid groups),  $1612\text{ cm}^{-1}$  (of the skeletal vibrations of un-oxidized graphite domains),  $1209\text{ cm}^{-1}$  (=C-OH stretching vibrations) and  $1043\text{ cm}^{-1}$  (C-O stretching vibrations). These results are in agreement with the results reported in the literature [7-9].

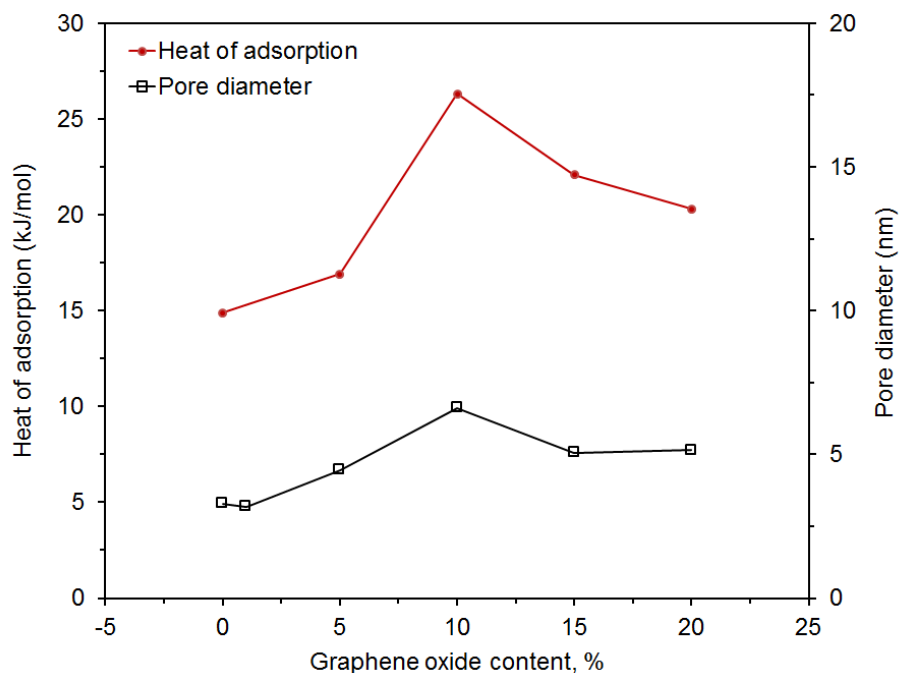

**Figure S3.** The relationship between the adsorption heat and the pore diameter as function of GO content.

## References

- [1] N. Zhang, H. Qiu, Y. Si, W. Wang and J. Gao, *Carbon*, 2011, **49**, 827-837.
- [2] J. Potts, D. R. Dreyer, C. W. Bielawski, R. and S. Ruoff, *Polymer*, 2011, **52**, 5-25.

- [3] A. Satti, P. Larpent and Y. Gun'ko, *Carbon*, 2010, **48**, 3376-3381.
- [4] F. Tuinstra and J. L. Koenig, *J. Chem. Phys.* **1970**, *53*, 1126-1130
- [5] S. Stankovich, D. A. Dikin, R. D. Piner, K. A. Kohlhaas, K. Kleinhammes, Y. Jia, Y. Wu, S. B. T. Nguyen and R. S. Ruoff, *Carbon*, 2007, **45**, 1558-1565.
- [6] T. C. Chiew and M. S. Dresselhaus, *Phys. Rev.* **1982** *26*, 5867.
- [7] M. Seredych, A. V. Tamashausky and T. J. Bandosz, *Adv. Funct. Mater.*, 2010, **20**, 1670-1679.
- [8] D. A. Dikin, S. Stankovick, E. J. Zimney, R. D. Piner, G. H. B. Dommett, G. Evmenenko, S. T. Nguyen and R. S. Ruoff, *Nature*, 2007, **448**, 457-460.
- [9] F. Kim, J. L. Cote and J. Huang, *Adv. Mater.* 2010, **22**, 1954-1958.
